# Supplementary material for: Systematic Review Article: New Drug Strategies for Treating Resistant Hypertension—the Importance of a Mechanistic, Personalized Approach
Source: Springer Nature journal article supplement (doi:10.1007/s40292-024-00634-4), 2024-04-14
Supplement: MOESM1 [file 26977612]

|                                | Randomization process | Deviations from the intended interventions | Missing outcome data | Measurement of the outcomes | Selection of the reported results | Overall Risk of bias |
|--------------------------------|-----------------------|--------------------------------------------|----------------------|-----------------------------|-----------------------------------|----------------------|
| NCT04519658, 2023 (BRIGHT-HTN) |                       |                                            |                      |                             |                                   |                      |
| NCT05001945, 2023 (TARGET-HTN) |                       |                                            |                      |                             |                                   |                      |
| NCT02603809, 2020              |                       |                                            |                      |                             |                                   |                      |
| NCT03541174, 2022 (PRECISION)  |                       |                                            |                      |                             |                                   |                      |
| NCT00758524, 2011              |                       |                                            |                      |                             |                                   |                      |

- Low risk
- Some Concerns
- High risk
